# Supplementary material for: Manipulating Reaction Energy Coordinate Landscape of Mechanochemical Diaza-Cope Rearrangement
Source: MDPI journal article supplement (doi:10.3390/molecules27082570), 2022-04-15
Supplement: s1 [file s1]

Supporting Information

# Manipulating Reaction Energy Coordinate Landscape of Mechanochemical Diaza-Cope Rearrangement.

Tingting Cheng <sup>1,†</sup>, Wenxian Ma <sup>1,2,3,†</sup>, Hao Luo <sup>1,†</sup>, Yangzhi Ye <sup>1</sup> and KaKing Yan <sup>1,\*</sup>

<sup>1</sup> School of Physical Science and Technology, ShanghaiTech University, Shanghai 201210, China

<sup>2</sup> Shanghai Advanced Research Institute, Chinese Academy of Sciences, Shanghai 201203, China

<sup>3</sup> University of Chinese Academy of Sciences, Beijing 100049, China

## Table of Contents

1. Ball milling equipment (Figure S1)
2. Silica gel loading effect on mechanochemical DCR reaction between (R,R)-**1** and **2a**. (Table S1)
3. Monitoring mechanochemical reaction with **1** and **2a** **with** silica gel (Figure S2-S3)
4. Monitoring mechanochemical reaction with **1** and **2a** **without** silica gel (Figure S4-S5)
5. FT-IR spectra of untreated silica gel, **SG**<sub>(314)</sub> and **SG**<sub>(528)</sub> (Figure S6)
6. PXRD studies (Figure S7)
7. General procedure for mechanochemical diaza-Cope rearrangement (Figure S8-S20)

## 1. Ball milling equipment

Ball-milling reactions were performed with a Shanghai Jing Xin JXFSTPRP-24 mixer mill. Polypropylene (PP) milling tubes (2 ml), stainless steel milling vessels (2 ml (JX-KG0177)), stainless steel milling vessels (15 ml (JX-KG0180)), and grinding balls (3.0 mm (JX-GZ0137) (stainless-steel), (JX-YG0123) ( $\text{ZrO}_2$ ) and 12.0 mm (JX-GZ0142)) were purchased from Shanghai Jing Xin.

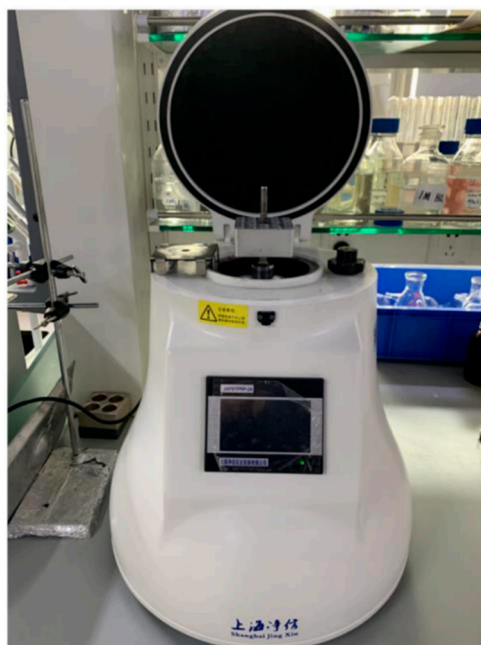

Shanghai Jing Xin JXFSTPRP-24 mixer mill

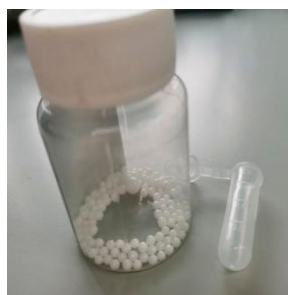

3.0 mm  $\text{ZrO}_2$  grinding balls and  
2 ml PP milling tube

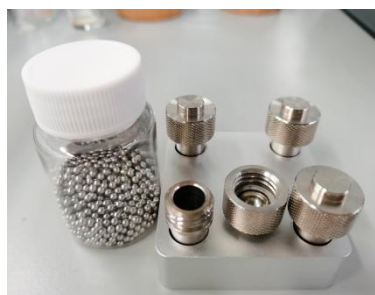

12.0 mm stainless-steel  
grinding balls and  
15 ml stainless-steel  
milling vessel

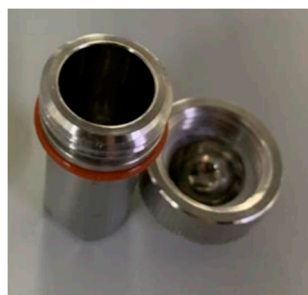

3.0 mm stainless-steel  
grinding ball and  
2 ml stainless-steel milling  
vessel

**Figure S1.** (Top) Ball-milling machine, and (bottom) ball-milling vessels and milling balls used in this study.

Silica gel loading effect on mechanochemical DCR reaction between (*R,R*)-**1** and **2a**.

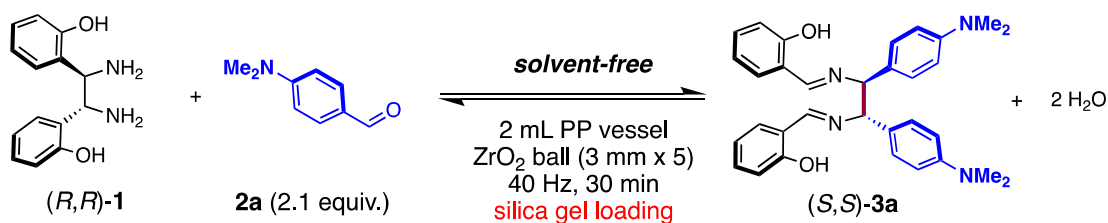

| Entry | mass of silica gel (mg) <sup>b</sup> | NMR yield (%) <sup>a</sup> |
|-------|--------------------------------------|----------------------------|
| 1     | 0                                    | 14                         |
| 2     | 10                                   | 48                         |
| 3     | 20                                   | 59                         |
| 4     | 30                                   | 62                         |
| 5     | 50                                   | 75                         |
| 6     | 100                                  | 76                         |

**Table S1.** Silica gel loading effect on mechanochemical DCR reaction between  $(R,R)\text{-1}$  and **2a**. <sup>a</sup> NMR (<sup>1</sup>H) spectrum is taken immediately after ball-milling reaction at the reported time. Yield is determined by comparing the <sup>1</sup>H NMR integration of **3a** to that of an internal standard (dibromomethane) with known concentration. <sup>b</sup> 300-400 mesh.

Monitoring mechanochemical reaction with **1** (0.082 mmol) and **2a** (0.174 mmol) **with** silica gel

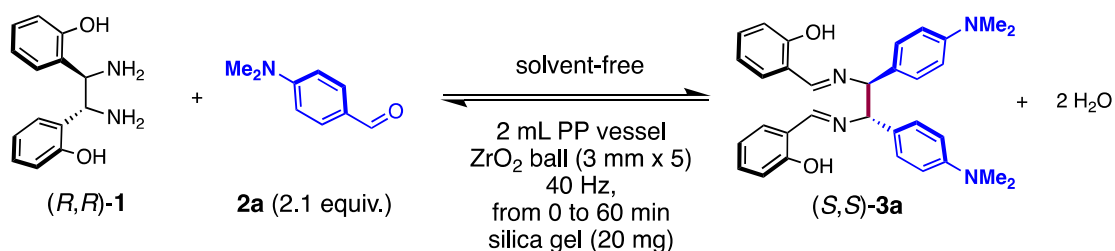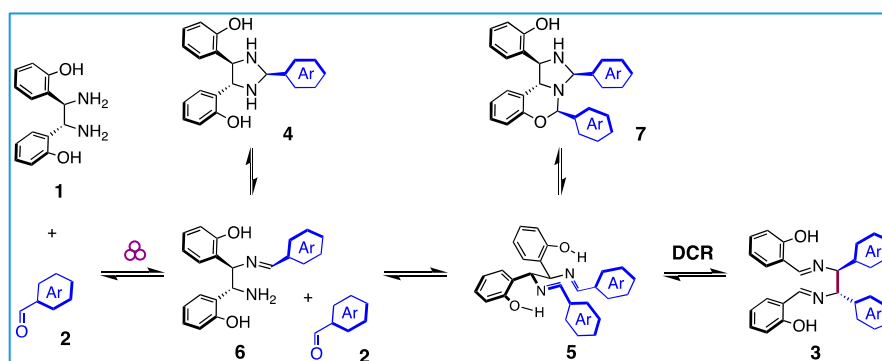

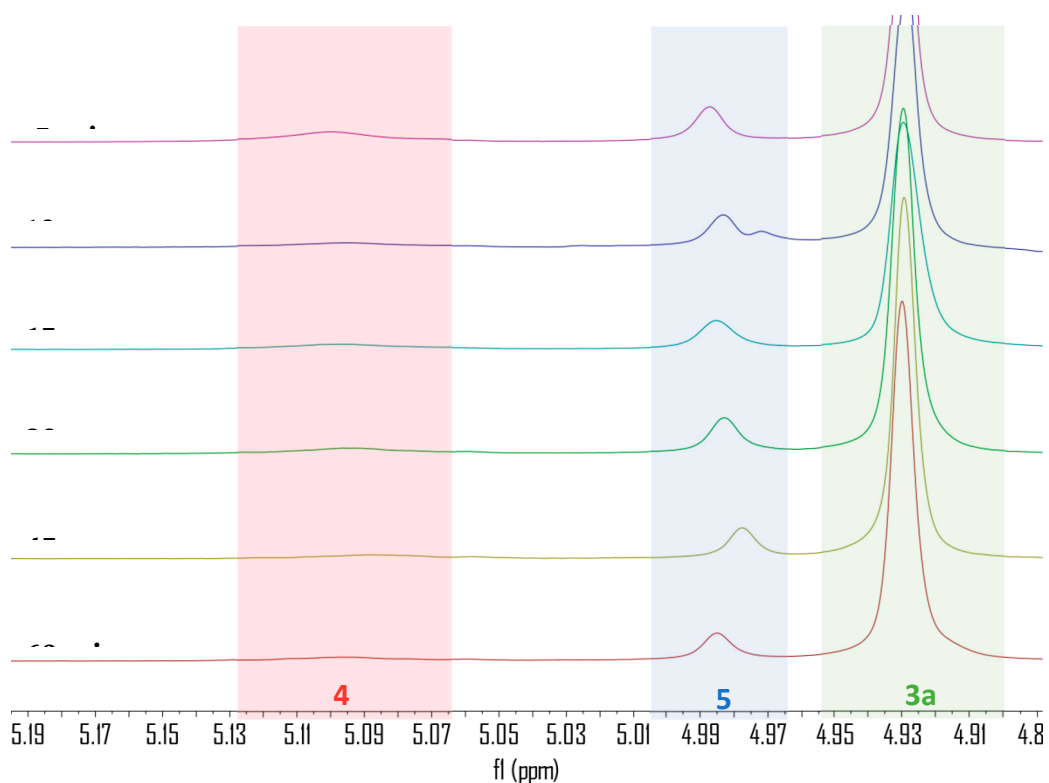

**Figure S2.**  $^1\text{H}$  NMR spectra of reaction time course monitoring **with** silica gel additive. The milled sample was dissolved in  $\text{DMSO}-d_6$  and the NMR sample was injected into an NMR spectrometer as quickly as possible (within 2 min) to minimize further solution reaction of the milled solid sample. After that, data acquisition began immediately to acquire the  $^1\text{H}$  NMR spectrum. Ratios of different species are determined by NMR integrations against an internal standard with known concentration.

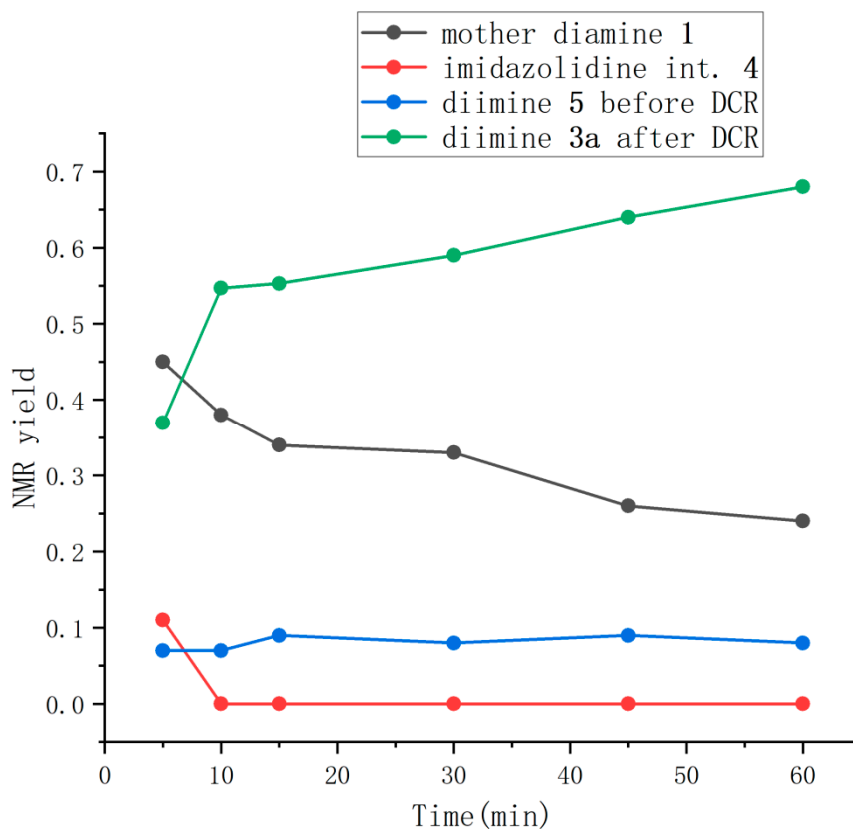

**Figure S3.** Plot of reaction time vs. NMR yield of different species in mechanochemical DCR **with** silica gel: **1** (mother diamine), **4** (intermediate), **5** (diimine intermediate before DCR) and **3a** (DCR product).

Monitoring mechanochemical reaction with **1** (0.082 mmol) and **2a** (0.174 mmol) **without** silica gel

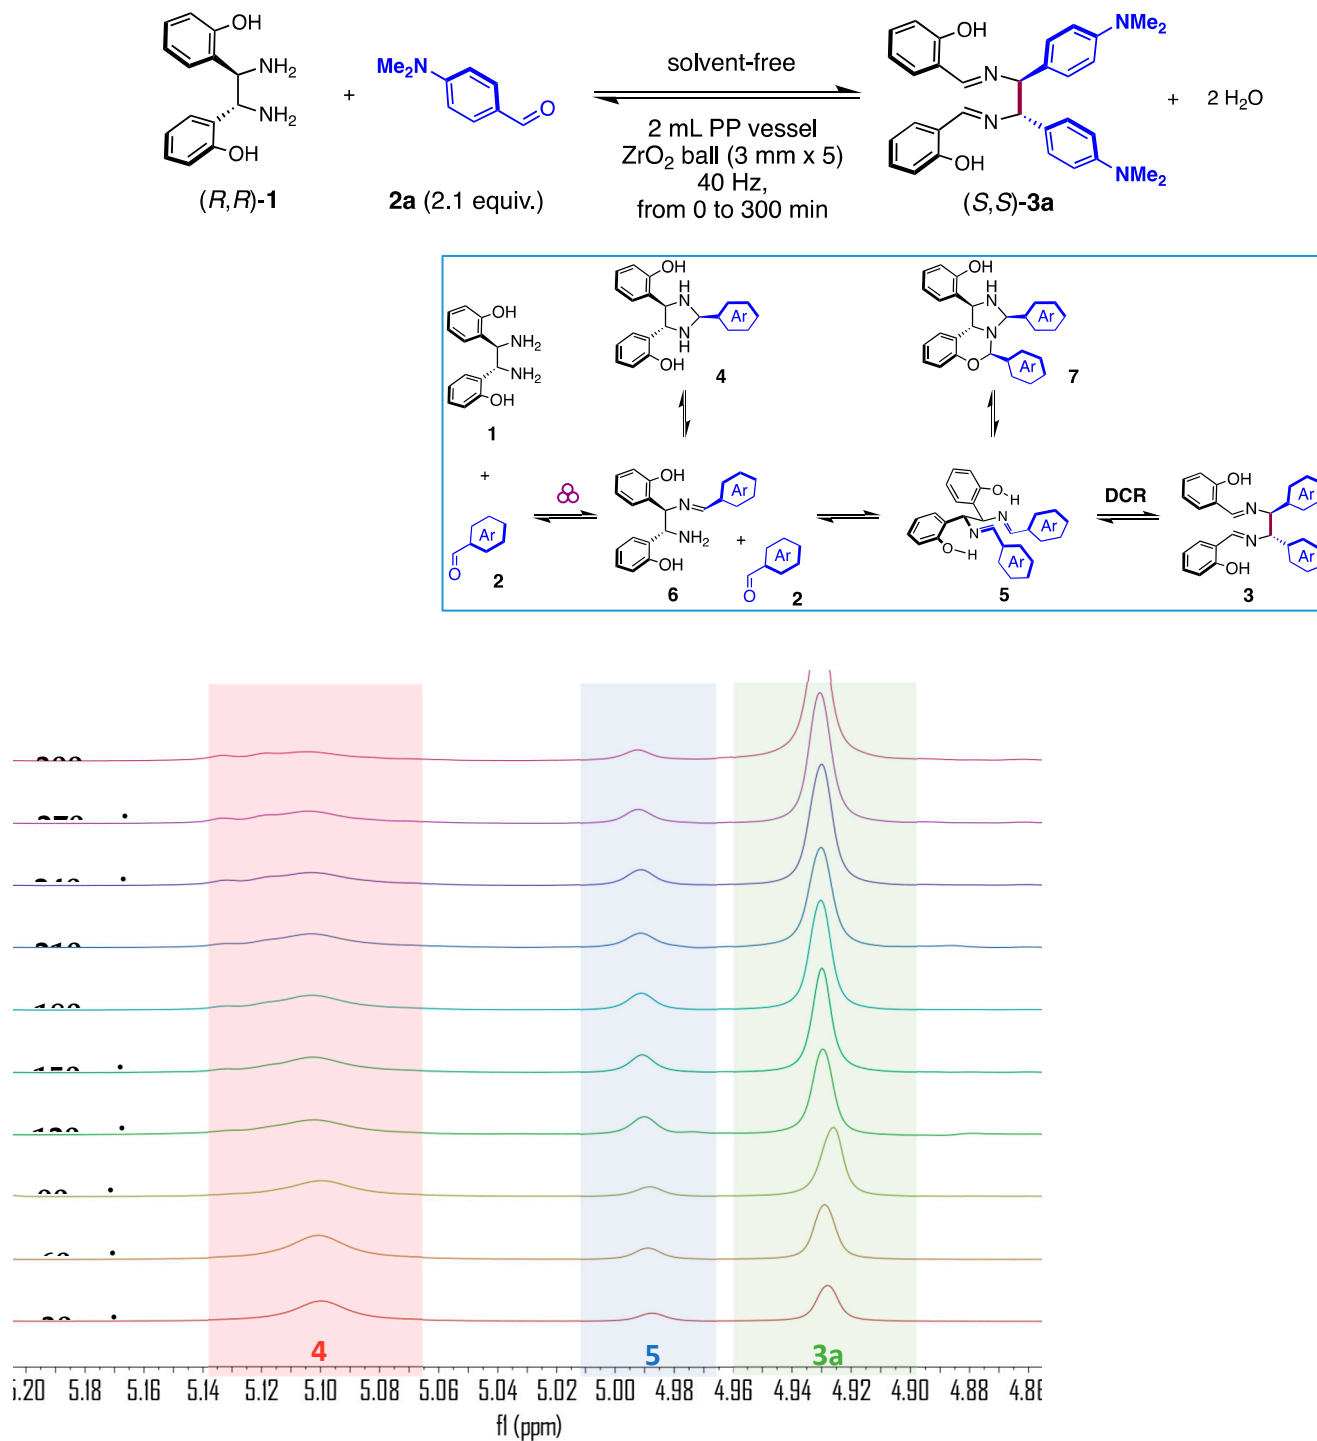

**Figure S4.** <sup>1</sup>H NMR spectra of reaction time course monitoring **without** silica gel. The milled sample was dissolved in DMSO-*d*<sub>6</sub> and the NMR sample was injected into an NMR spectrometer as quickly as possible (within 2 min) to minimize further solution reaction of the milled solid sample. After that, data acquisition began immediately to acquire the <sup>1</sup>H NMR spectrum. Ratios of different species are determined by NMR integrations against an internal standard with known concentration.

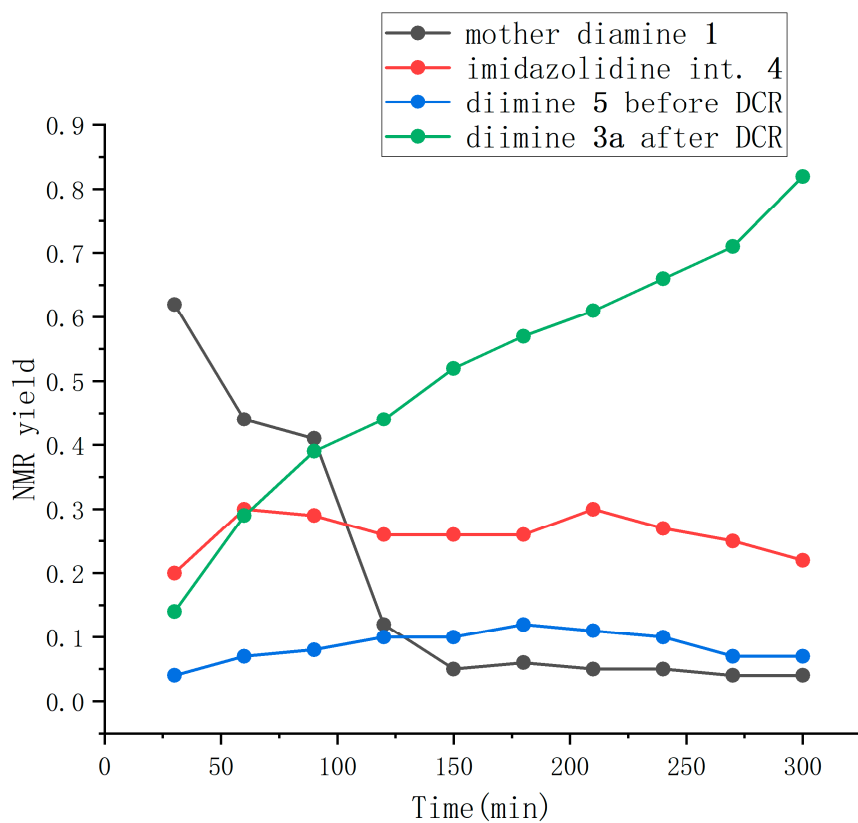

**Figure S5.** Plot of reaction time vs. NMR yield of different species in mechanochemical DCR **without** silica gel: **1** (mother diamine), **4** (intermediate), **5** (diimine intermediate before DCR) and **3a** (DCR product).

FT-IR spectra of  $\text{SG}_{(314)}$  and  $\text{SG}_{(528)}$

- Activated silica gel samples were thermolyzed under dynamic vacuum at the designated temperature with a heating furnace for 5 h, prior to mechanochemical diaza-Cope rearrangement.

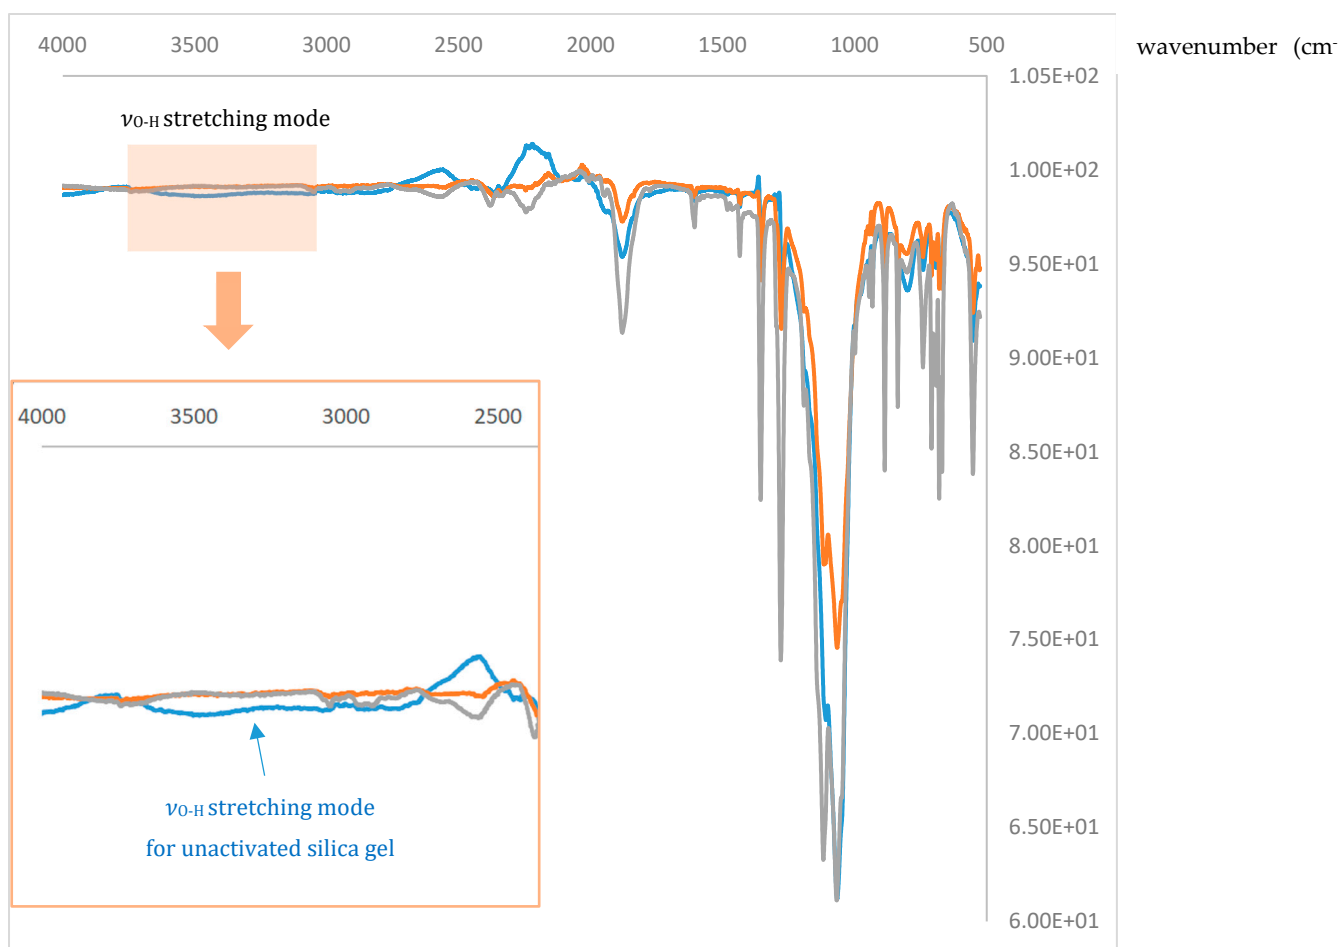

**Figure S6.** FT-IR spectra of silica gel<sub>(314)</sub> and silica gel<sub>(528)</sub>.

**Blue:** silica gel

**Orange:** silica gel<sub>(528)</sub>

**Grey:** silica gel<sub>(314)</sub>

From  $\sim 2800\text{--}3500\text{ cm}^{-1}$ , untreated silica gel shows a broad peak which belongs to -OH stretching mode, while SG<sub>314</sub> and SG<sub>528</sub> both have no signals. This confirms the condensation of silanol groups under thermal treatment.

## 1. PXRD studies

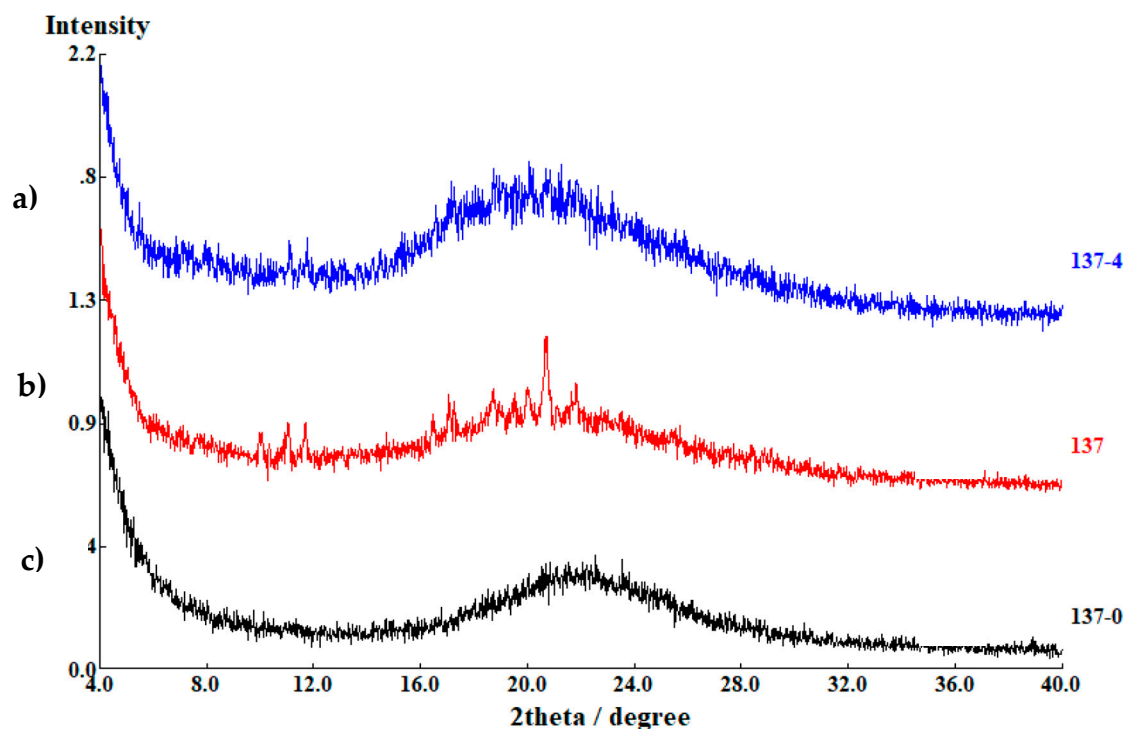

**Figure S7.** PXRD patterns of a) **1** (0.041 mmol) and **2a** (0.087 mmol) under 5 min, 40 Hz ball milling containing silica gel and 7 days aging without any purification; b) **1** (0.041 mmol) and **2a** (0.087 mmol) under 5 min, 40 Hz ball milling containing silica gel without any purification; c) silica gel after 5 min, 40 Hz ball milling.

- The PXRD spectra showed mainly the amorphous phase from silica gel with a broad peak from 15° to 28°.

## 2. General procedure for mechanochemical diaza-Cope rearrangement (0.2 mmol scale)

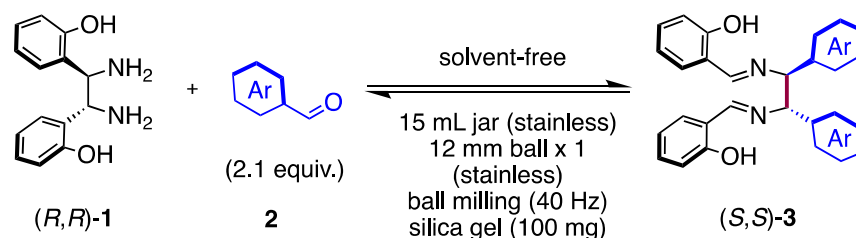

(1*R*,2*R*)-1,2-Bis(2-hydroxyphenyl)ethylenediamine **1**, arylaldehyde **2** (2.1 equiv.) were placed in a stainless steel ball-milling vessel (15 mL) loaded with one grinding ball (stainless steel, diameter: 12 mm). After the vessel was closed in open air, the vessel was placed in the ball mill machine. After 4 h of ball-milling at 40 Hz, with a periodic 5 min pause for every 1 h of milling, the solid residual was dissolved in DCM, and then purified by chromatography (eluent hexane: ethyl acetate = 10 :1 to 1:1) to give product **3**.

2,2'-[[1*S*,2*S*)-1,2-di(2-iodophenyl)-1,2-ethanediyl]bis[(*E*)-nitrilomethylidyne]]bisphenol (**3e**).

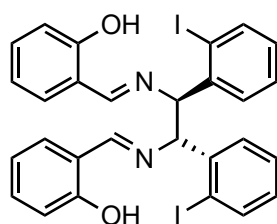



Prepared according to general procedure from **1** (50 mg, 0.20 mmol) and 2-iodobenzaldehyde (**2e**) (98 mg, 0.42 mmol) to give the title compound as a yellow solid (82 mg, 61%).

$^1\text{H}$  NMR ( $\text{CDCl}_3$ , 400 MHz, 25 °C)  $\delta$  13.06 (s, 2H), 8.44 (s, 2H), 7.69 (ddd,  $J$  = 15.6, 7.9, 1.5 Hz, 4H), 7.33-7.26 (m, 4H), 7.19 (dd,  $J$  = 7.7, 1.7 Hz, 2H), 6.94-6.91 (m, 2H), 6.90-6.85 (m, 2H), 6.82 (td,  $J$  = 7.4, 1.1 Hz, 2H), 5.44 (s, 2H).

$^{13}\text{C}\{^1\text{H}\}$  NMR ( $\text{CDCl}_3$ , 101 MHz, 25 °C)  $\delta$  166.73, 160.90, 140.61, 139.68, 132.82, 132.05, 130.68, 129.64, 128.67, 118.89, 118.53, 116.93, 100.52, 80.33.

HRMS (ESI) calculated for  $\text{C}_{28}\text{H}_{22}\text{I}_2\text{N}_2\text{O}_2$ ,  $[\text{M}+\text{H}]^+$ : 672.9843, Found: 672.9843.

HPLC: Chiralpak IC column, 95:5 n-hexane/ iso-propanol, 1 ml/min; (*R,R*)-**3e**  $t_R$  = 6.0 min, (*S,S*)-**3e**  $t_R$  = 7.0 min for racemic sample of **3e**.

ee: 98%.

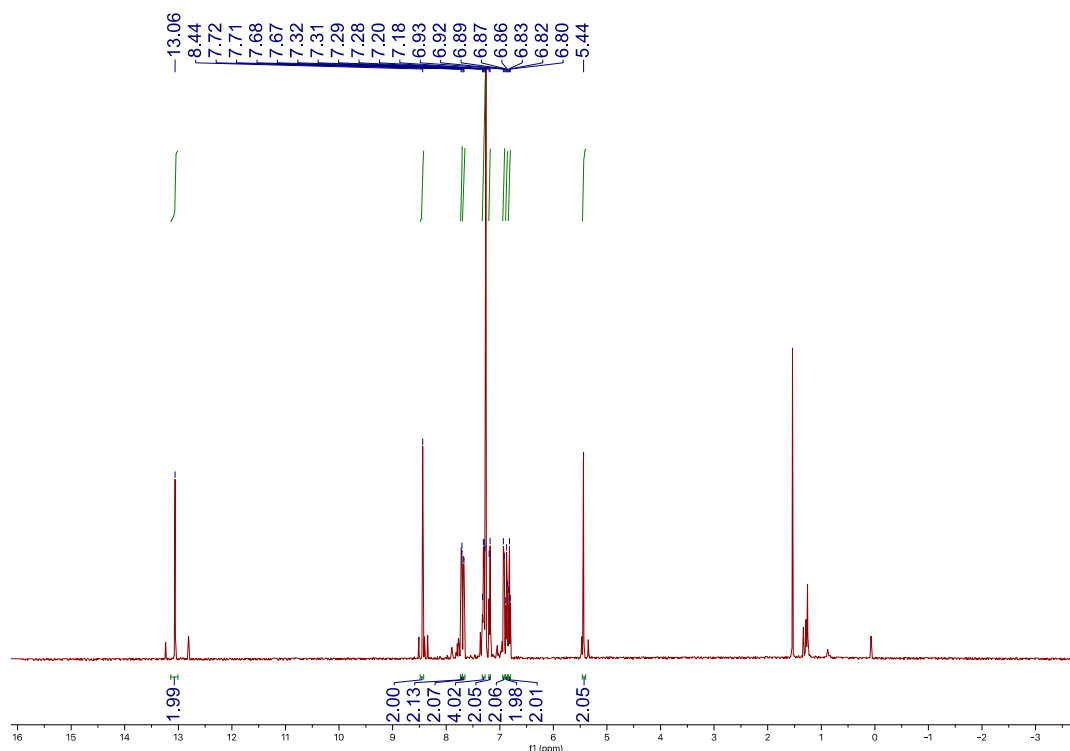

Figure S8.  $^1\text{H}$  NMR spectrum of **3e**.

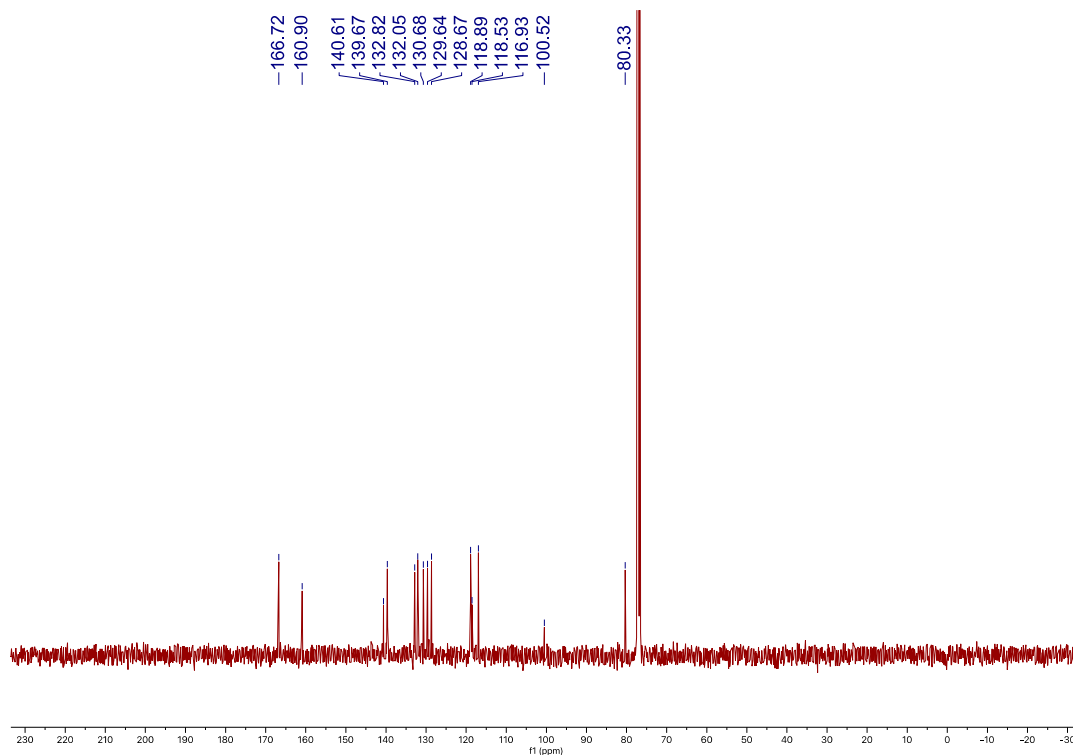

Figure S9.  $^{13}\text{C}\{^1\text{H}\}$  NMR spectrum of **3e**.

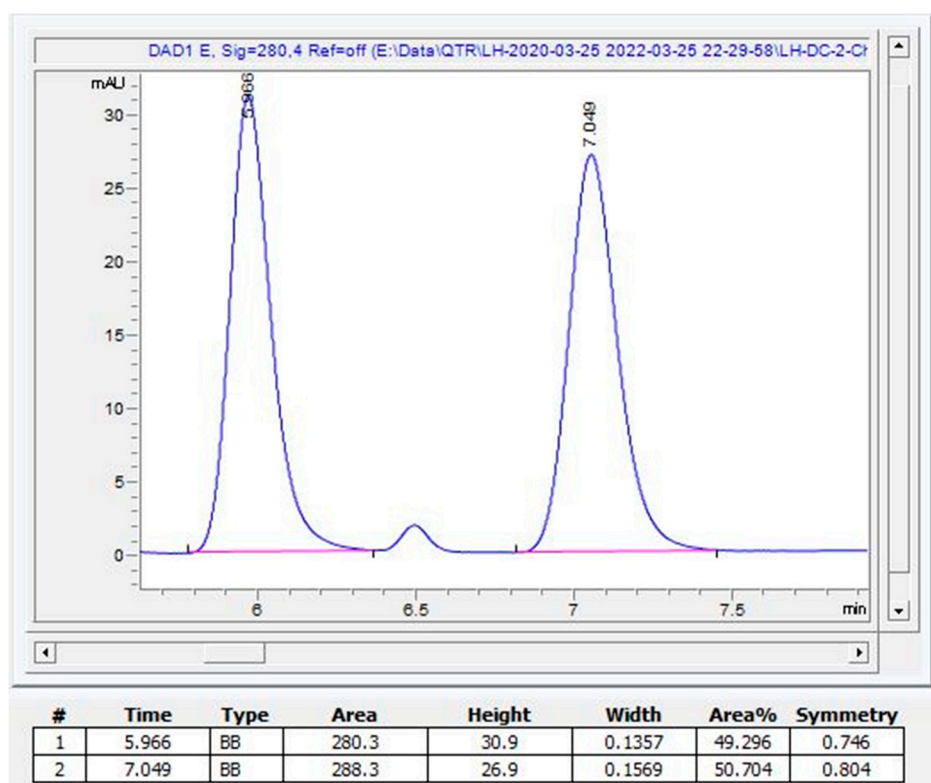

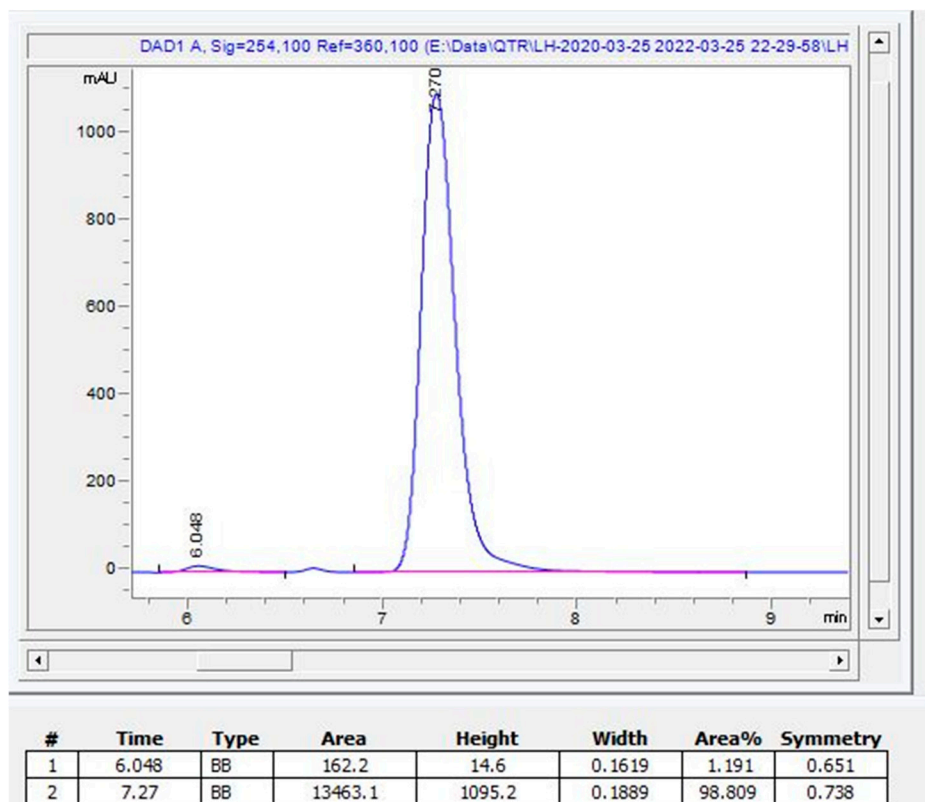

**Figure S10.** HPLC analysis of (top) racemic sample and (bottom) (*S,S*) sample of **3e**.

2,2'-[[[(1*S*,2*S*)-1,2-di((2-phenyl)phenyl)-1,2-ethanediyl]]bis[(*E*)-nitrilomethylidene]]bi-phenol (**3f**)

Prepared according to general procedure from **1** (50 mg, 0.20 mmol) and [1,1'-bi-phenyl]-2-carbaldehyde (**2f**) (78 mg, 0.42 mmol) to give the title compound as a yellow solid (78 mg, 68%).

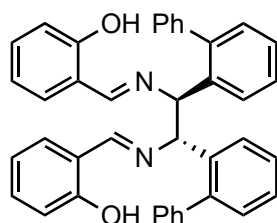

$^1\text{H}$  NMR ( $\text{CDCl}_3$ , 400 MHz, 25  $^\circ\text{C}$ )  $\delta$  13.05 (s, 2H), 8.00 (s, 2H), 7.23 (dt,  $J$  = 7.1, 4.0 Hz, 4H), 7.11-6.94 (m, 12H), 6.88-6.84 (m, 2H), 6.79-6.68 (m, 6H), 6.62 (td,  $J$  = 7.5, 1.1 Hz, 2H), 4.87 (s, 2H).

$^{13}\text{C}\{^1\text{H}\}$  NMR ( $\text{CDCl}_3$ , 101 MHz, 25  $^\circ\text{C}$ )  $\delta$  165.64, 160.82, 142.08, 140.68, 135.95, 132.49, 131.73, 129.93, 129.66, 128.67, 128.14, 128.03, 127.83, 127.29, 127.18, 127.00, 118.75, 118.56, 116.98, 116.77.

HRMS (ESI) calculated for  $\text{C}_{40}\text{H}_{32}\text{N}_2\text{O}_2$ ,  $[\text{M}+\text{H}]^+$ : 573.2537, Found: 573.2544.

HPLC: Chiralpak IA column, 98:2 n-hexane/iso-propanol, 1 ml/min; (*R,R*)-**3f**  $t_R$  = 14.3 min, (*S,S*)-**3f**  $t_R$  = 4.7 min for racemic sample of **3f**.

ee: 96%.

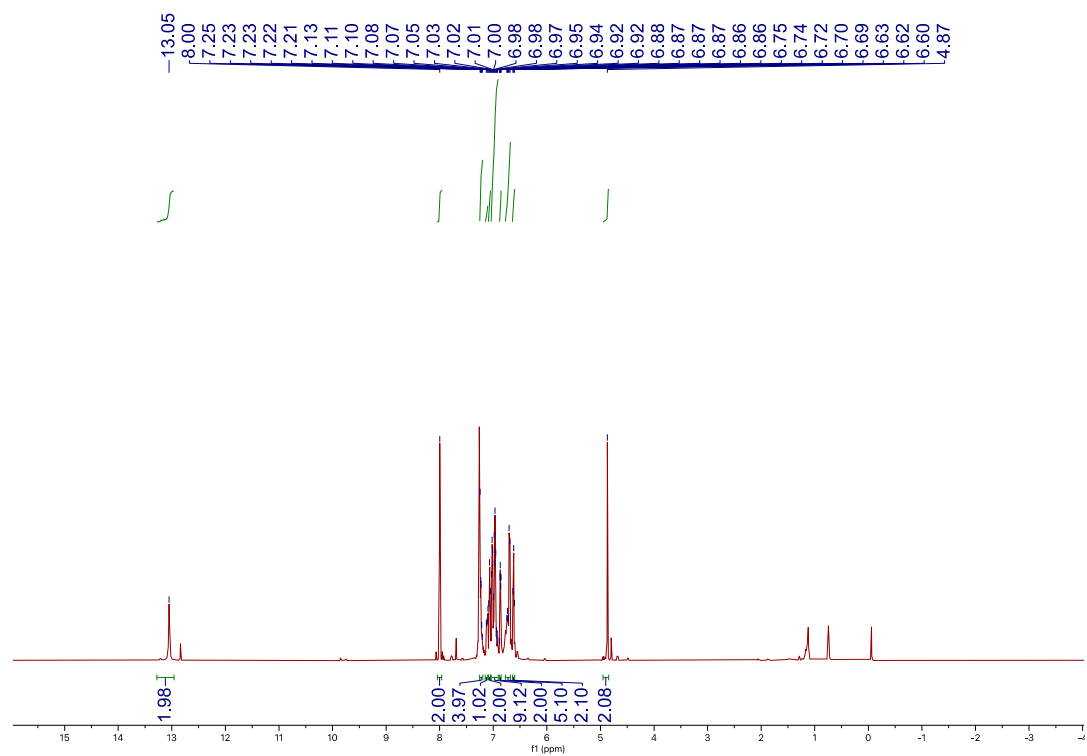

Figure S11. <sup>1</sup>H NMR spectrum of 3f.

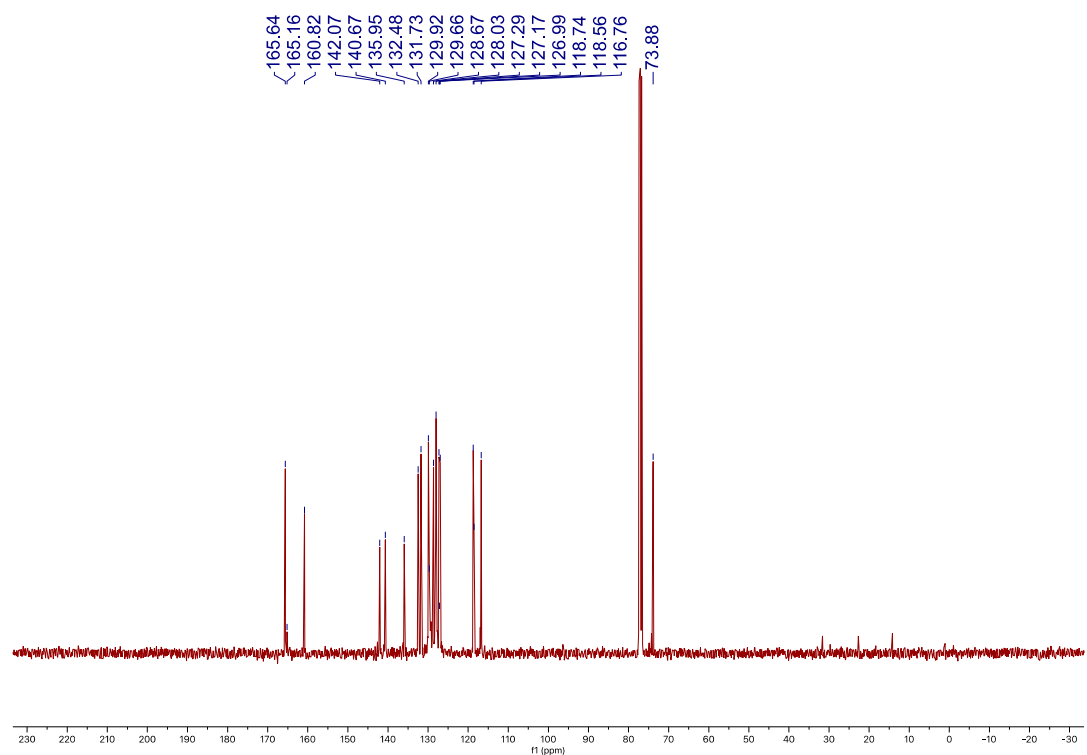

Figure S12. <sup>13</sup>C{<sup>1</sup>H} NMR spectrum of 3f.

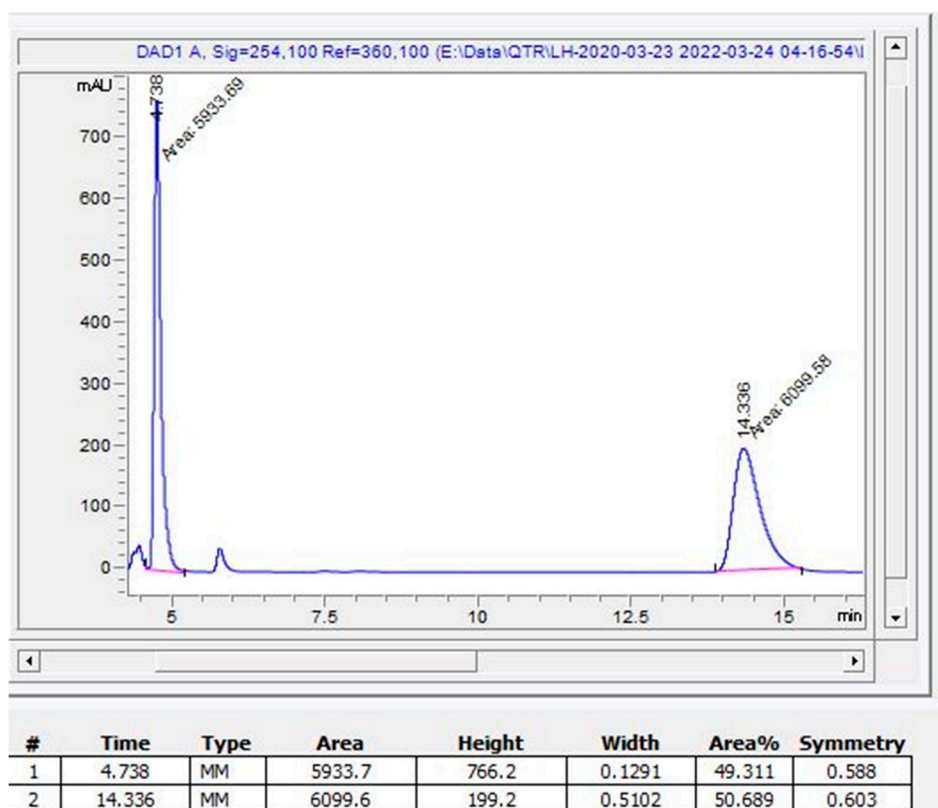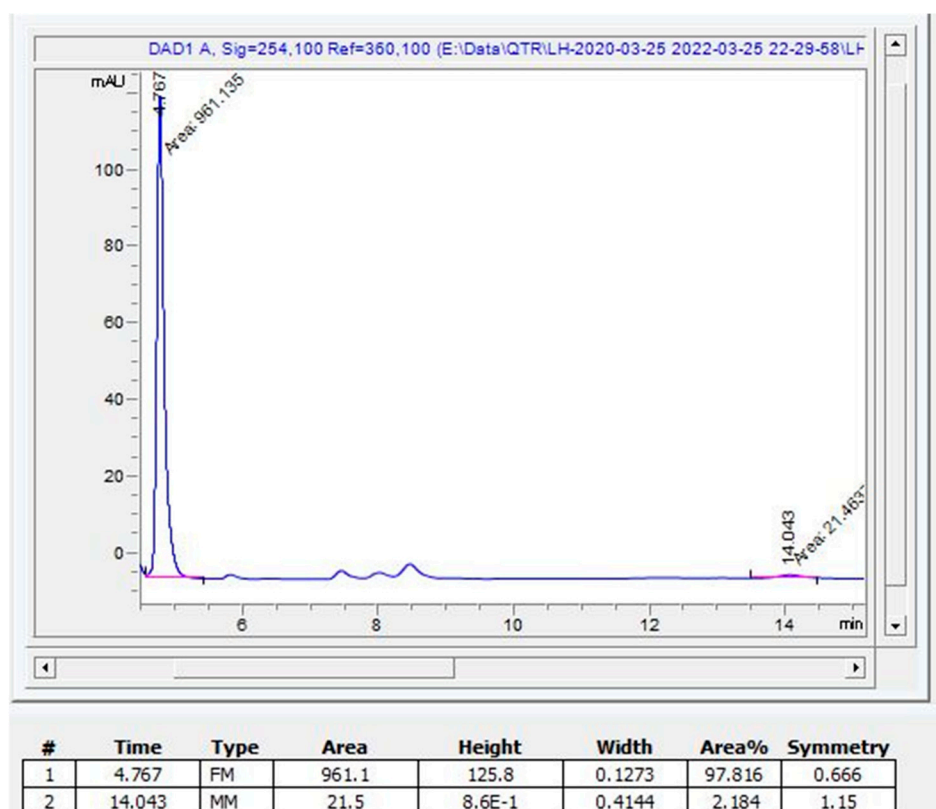

**Figure S13.** HPLC analysis of (top) racemic sample and (bottom) (*S,S*) sample of **3f**.

2,2'-[[[(1*S*,2*S*)-1,2-di(2-(4,4,5,5-tetramethyl-1,3,2-dioxaborolan-2-yl)phenyl)-1,2-ethanediyl]bis[(*E*)-nitrilomethylidyne]]]bisphenol (**3h**).

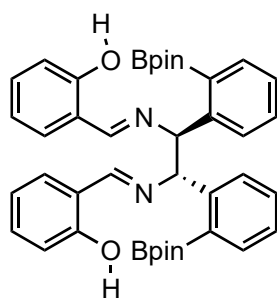

Prepared according to general procedure from **1** (50 mg, 0.20 mmol) and 2-(4,4,5,5-tetramethyl-1,3,2-dioxaborolan-2-yl)benzaldehyde (**2h**) (98 mg, 0.42 mmol) to give the title compound as a yellow solid (30 mg, 22%).

$^1\text{H}$  NMR ( $\text{CDCl}_3$ , 400 MHz, 25  $^\circ\text{C}$ )  $\delta$  13.67 (s, 2H), 8.52 (s, 2H), 7.75 (d,  $J$  = 7.8 Hz, 2H), 7.58 (dd,  $J$  = 7.5, 1.5 Hz, 2H), 7.35 – 7.29 (m, 2H), 7.25 – 7.21 (m, 2H), 7.17 (dd,  $J$  = 7.7, 1.7 Hz, 2H), 7.06 (td,  $J$  = 7.4, 1.1 Hz, 2H), 6.87 (d,  $J$  = 8.2 Hz, 2H), 6.79 (td,  $J$  = 7.4, 1.1 Hz, 2H), 6.11 (s, 2H), 1.44 (s, 12H), 1.38 (s, 12H).

$^{13}\text{C}$  NMR ( $\text{CDCl}_3$ , 101 MHz, 25  $^\circ\text{C}$ )  $\delta$  165.89, 161.07, 145.97, 136.22, 132.15, 131.69, 131.15, 128.14, 126.49, 119.02, 118.52, 116.71, 83.81, 75.00, 25.05.

$^{11}\text{B}$  NMR ( $\text{CDCl}_3$ , 128 MHz, 25  $^\circ\text{C}$ )  $\delta$  4.30.

HRMS (ESI) calculated for  $\text{C}_{40}\text{H}_{46}\text{B}_2\text{N}_2\text{O}_6$ ,  $[\text{M}+\text{H}]^+$ : 673.3615, Found: 673.3659.

HPLC: Chiralpak IC column, 95:5 n-hexane/iso-propanol, 1 ml/min; (*R,R*)-**3h**  $t_R$  = 5.3 min, (*S,S*)-**3h**  $t_R$  = 4.4 min for racemic sample of **3h**.

ee: 99%.

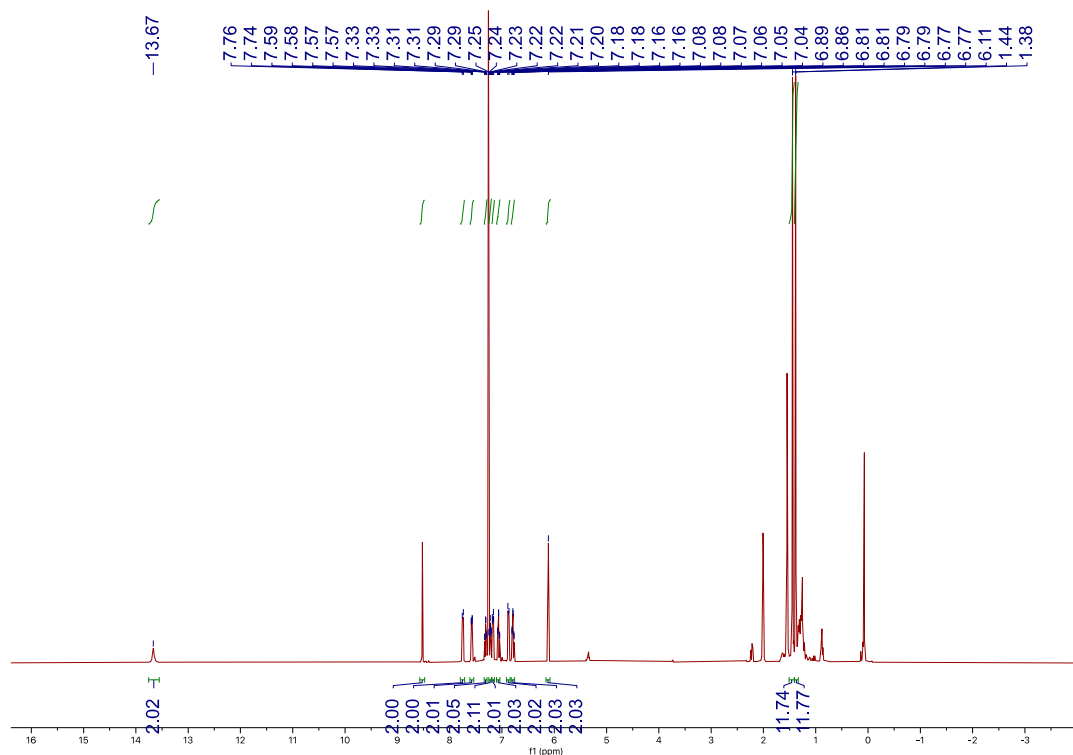

Figure S14.  $^1\text{H}$  NMR spectrum of **3h**.

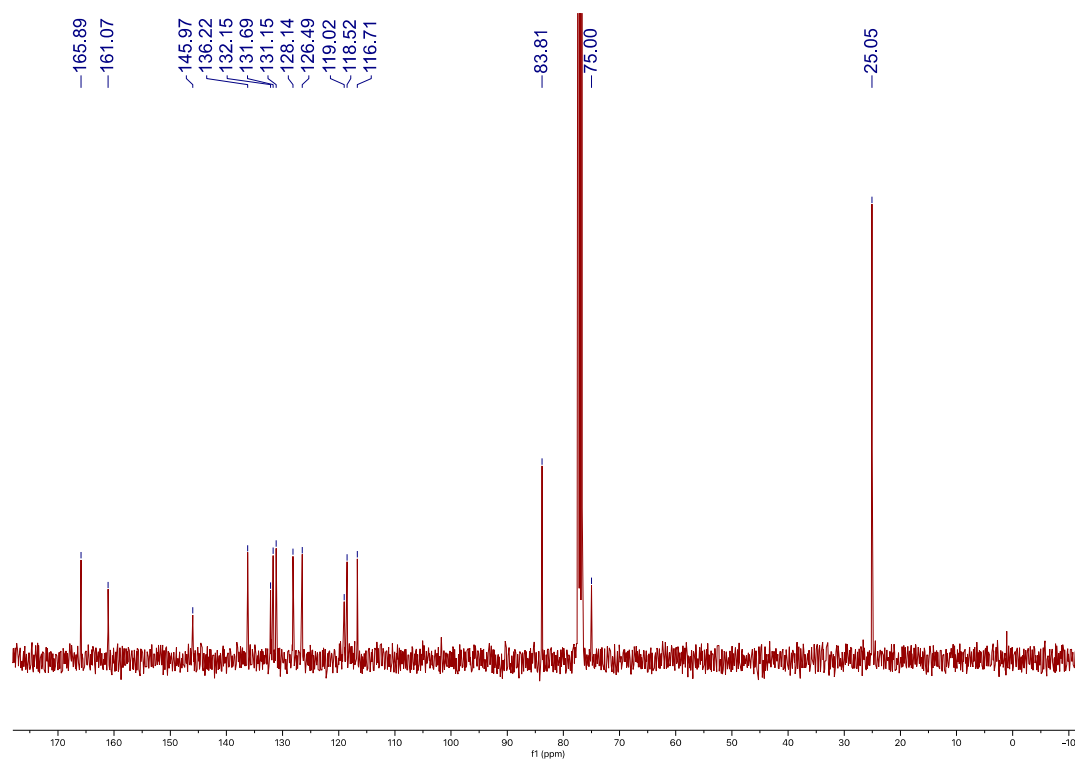

**Figure S15.**  $^{13}\text{C}\{^1\text{H}\}$  NMR spectrum of **3h**.

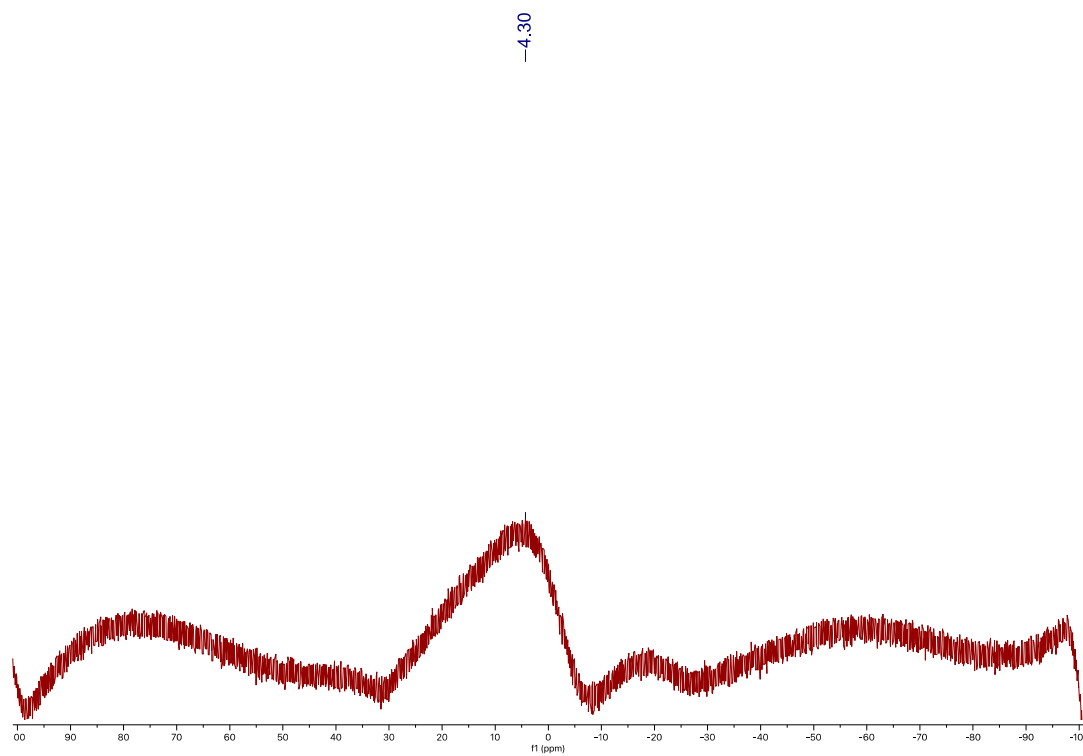

**Figure S16.**  $^{11}\text{B}$  NMR spectrum of **3h**.

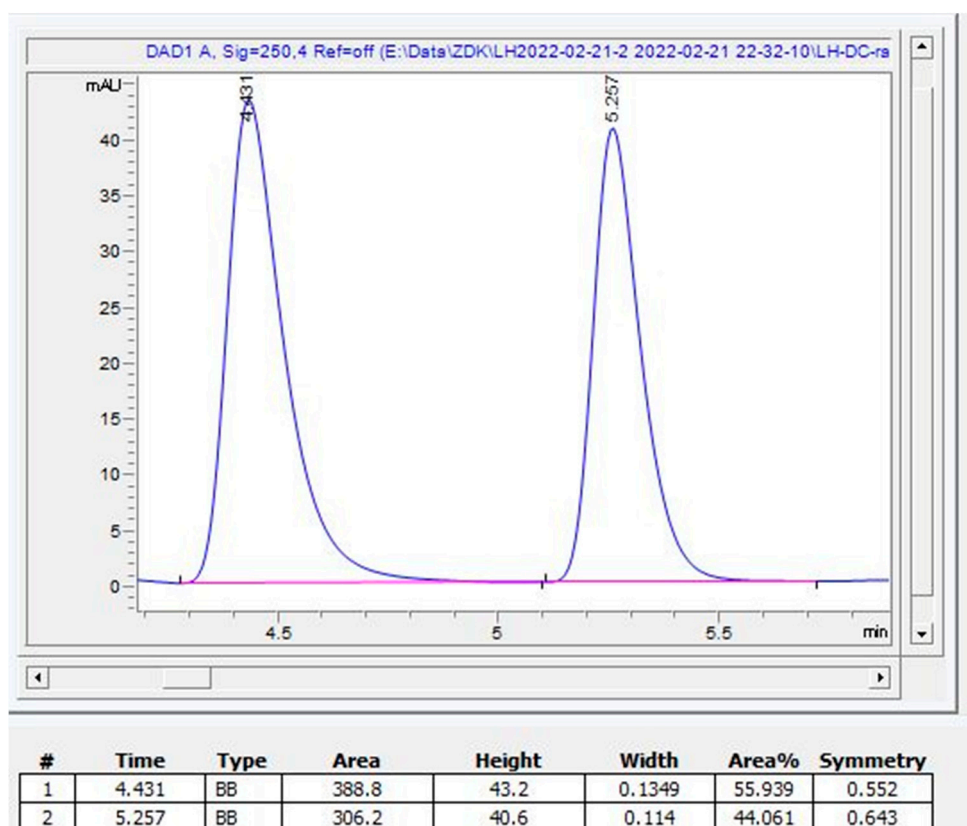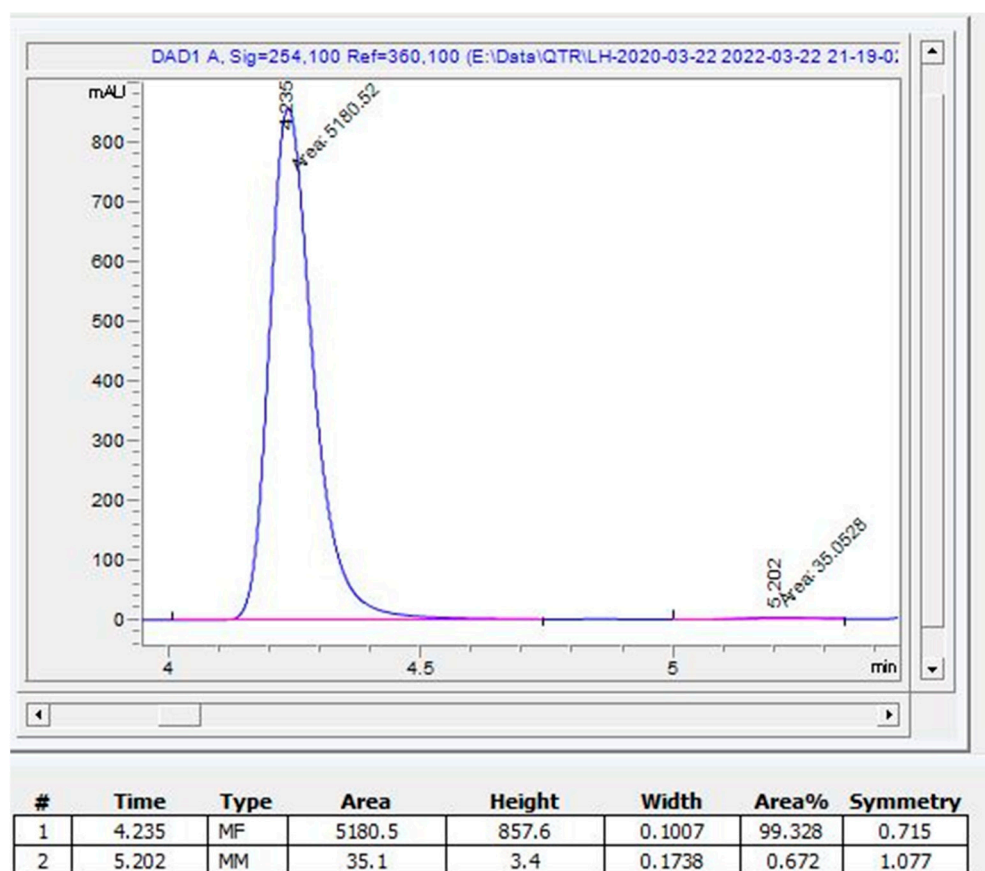



**Figure S17.** HPLC analysis of (top) racemic sample and (bottom) (*S,S*) sample of **3h**.2,2'-[[[(1*S*, 2*S*)-1,2-di(3-bromonaphthalen-2-yl)-1,2-ethanediyl]bis[(*E*)-nitrilomethyldyne]] bisphenol (**3i**)

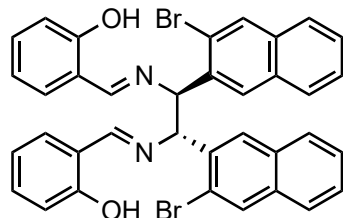

Prepared according to general procedure from **1** (50 mg, 0.20 mmol) and 3-bromo-2-naphthaldehyde (**2i**) (99 mg, 0.42 mmol) to give the title compound as a yellow solid (76 mg, 48%).

$^1\text{H}$  NMR ( $\text{CDCl}_3$ , 500 MHz, 25  $^\circ\text{C}$ )  $\delta$  13.28 (s, 2H), 8.42 (s, 2H), 8.26 (d,  $J$  = 8.6 Hz, 2H), 7.82 (d,  $J$  = 8.6 Hz, 2H), 7.70 (t,  $J$  = 8.1 Hz, 4H), 7.52 (t,  $J$  = 7.7 Hz, 2H), 7.45 (t,  $J$  = 7.5 Hz, 2H), 7.28 (t,  $J$  = 7.6 Hz, 2H), 7.13 (d,  $J$  = 7.6 Hz, 2H), 6.97 (d,  $J$  = 8.3 Hz, 2H), 6.80 (t,  $J$  = 7.5 Hz, 2H), 6.06 (s, 2H).

$^{13}\text{C}$  NMR ( $\text{CDCl}_3$ , 101 MHz, 25  $^\circ\text{C}$ )  $\delta$  167.30, 161.03, 136.03, 133.98, 132.84, 132.13, 132.03, 128.15, 128.05, 128.00, 127.49, 126.85, 123.95, 118.84, 118.58, 117.02, 76.46.

HRMS (ESI) calculated for  $\text{C}_{36}\text{H}_{26}\text{Br}_2\text{N}_2\text{O}_2$ ,  $[\text{M}+\text{H}]^+$ : 679.0413, Found: 679.0427.

HPLC: Chiralpak IC column, 95:5 n-hexane/iso-propanol, 1 ml/min; (*R,R*)-**3i**  $t_R$  = 7.8 min, (*S,S*)-**3i**  $t_R$  = 8.8 min for racemic sample of **3i**. ee > 99%

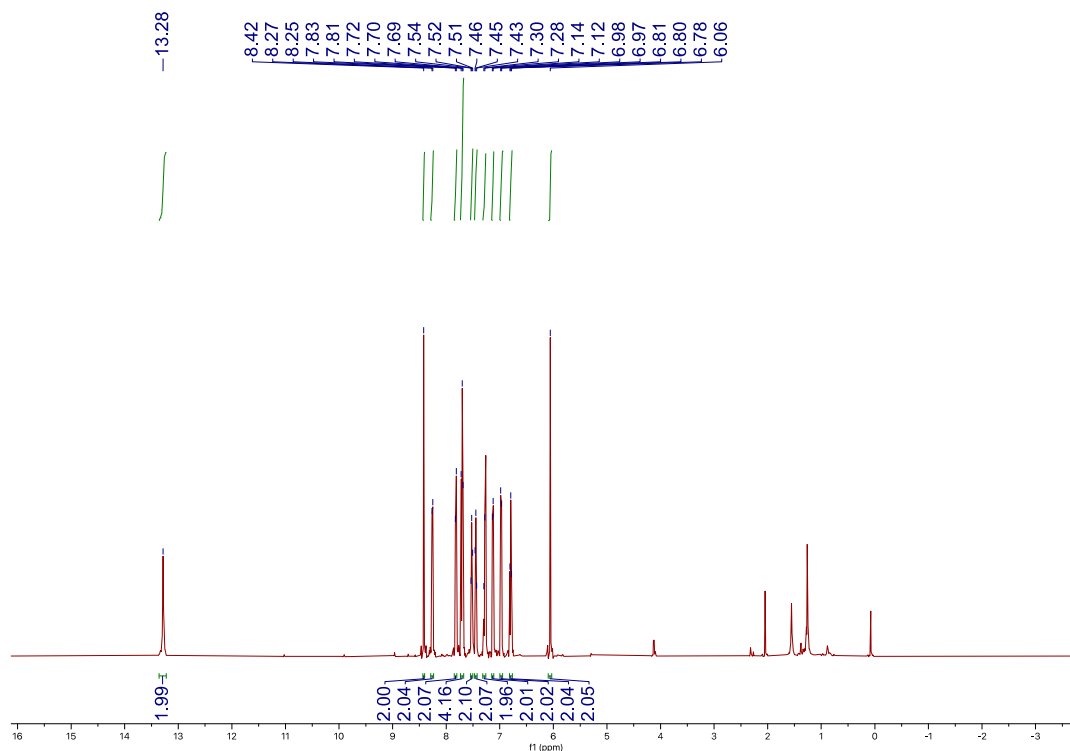

**Figure S18.**  $^1\text{H}$  NMR spectrum of **3i**.

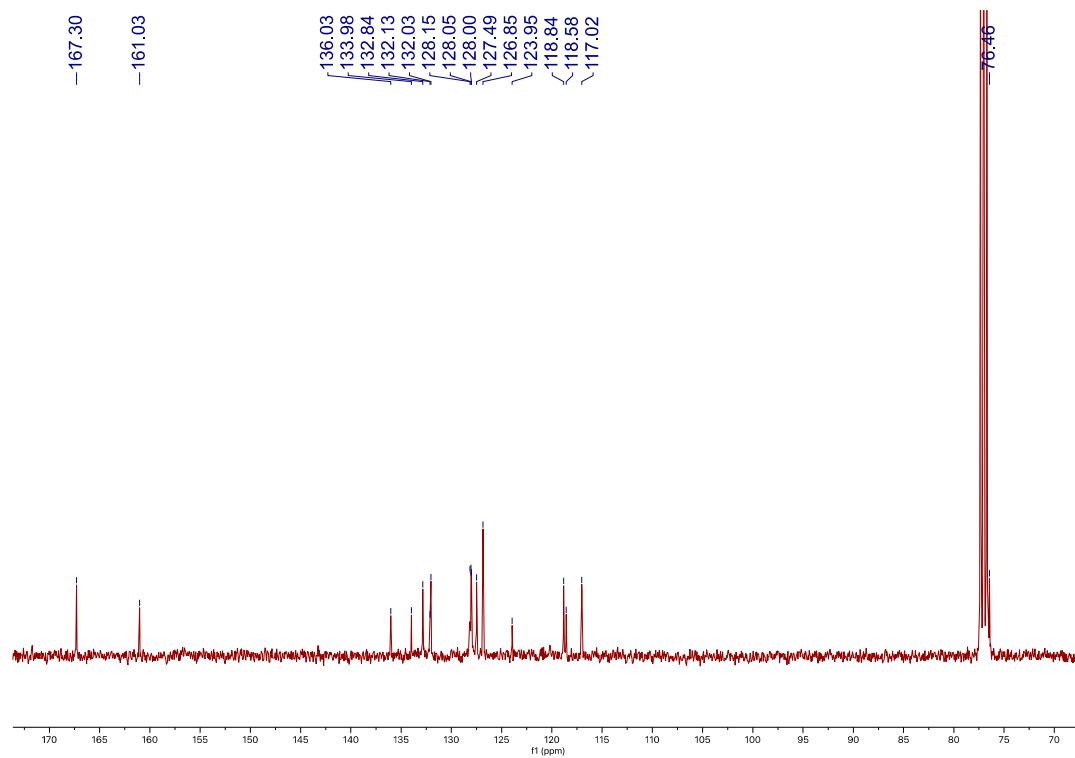

Figure S19.  $^{13}\text{C}\{^1\text{H}\}$  NMR spectrum of **3i**.

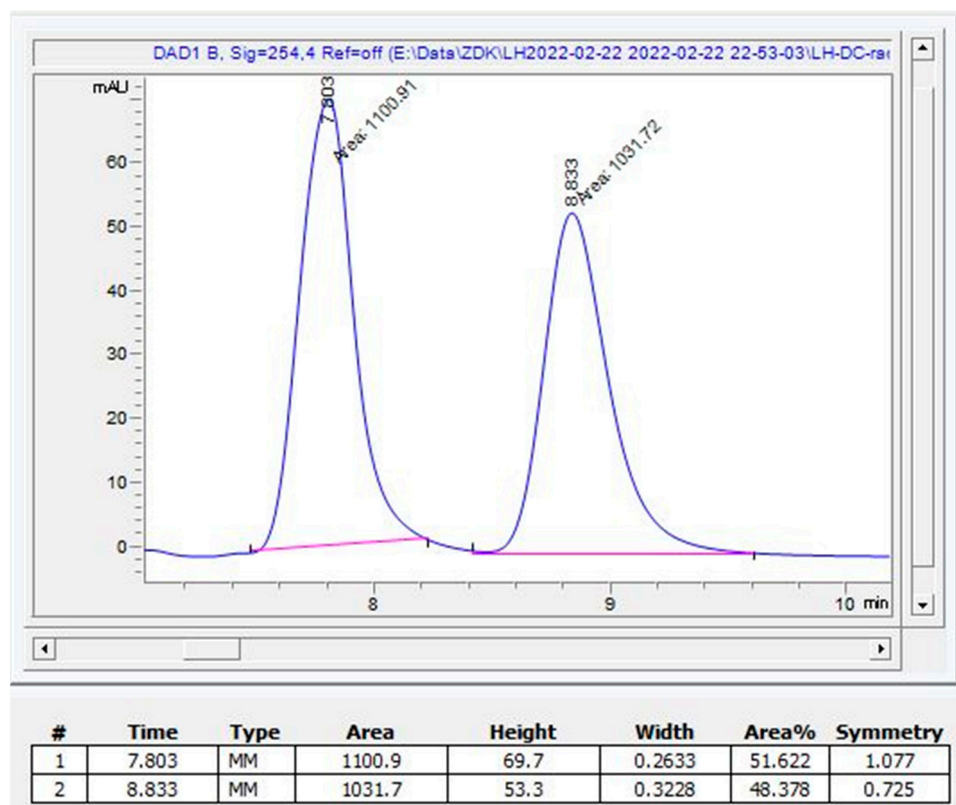

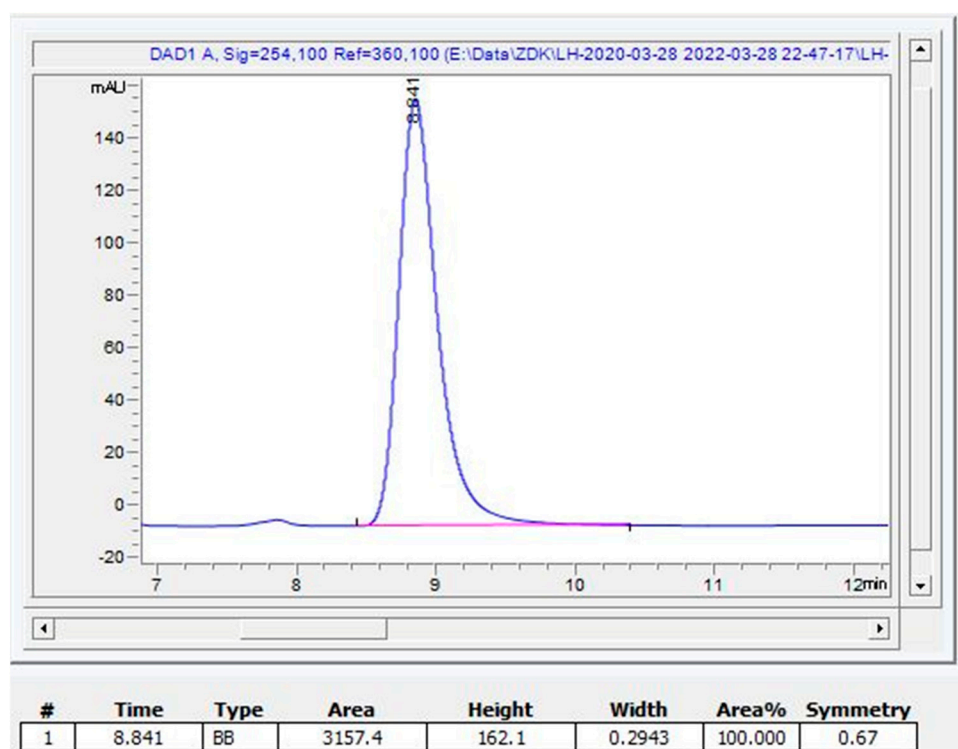

Figure S20. HPLC analysis of (top) racemic sample and (bottom) (*S,S*) sample of **3i**.
